# Supplementary material for: Decrease in UCP1 by sustained high lipid promotes NK cell necroptosis to exacerbate nonalcoholic liver fibrosis
Source: PubMed Central journal article supplement (PMC11271447; doi:10.1038/s41419-024-06910-4), 2024-07-20
Supplement: 41419_2024_6910_MOESM2_ESM.pdf [file 41419_2024_6910_MOESM2_ESM.pdf]

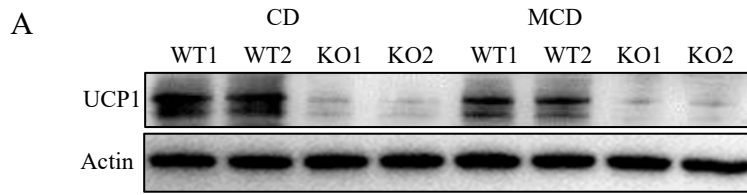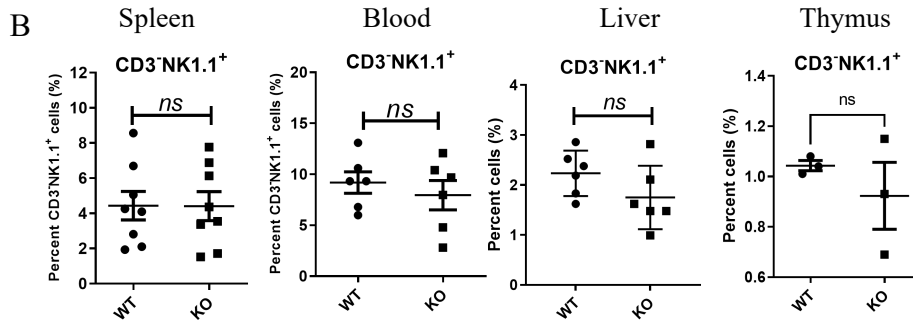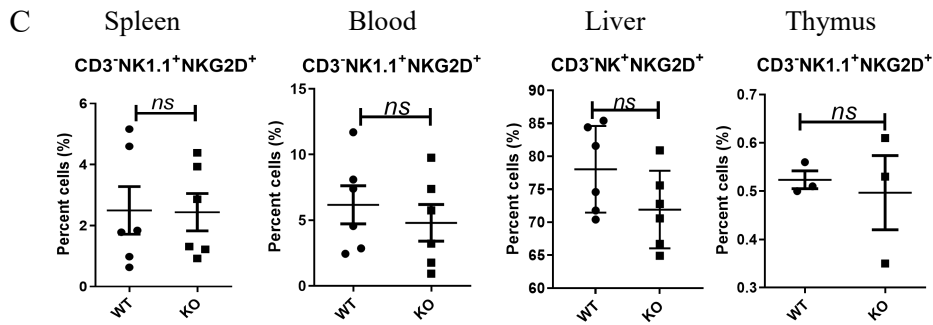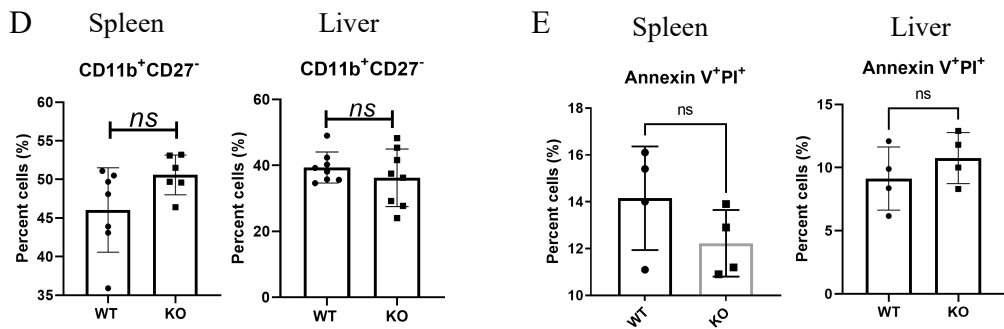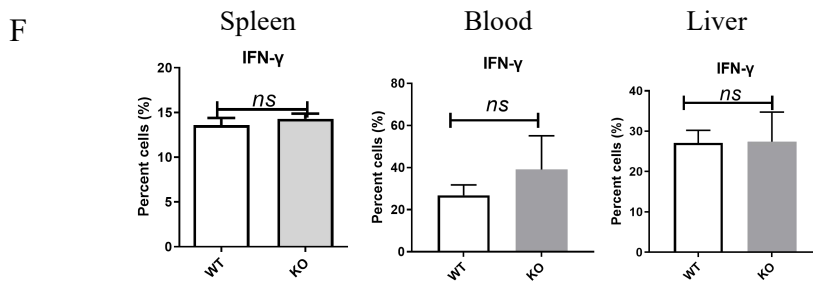

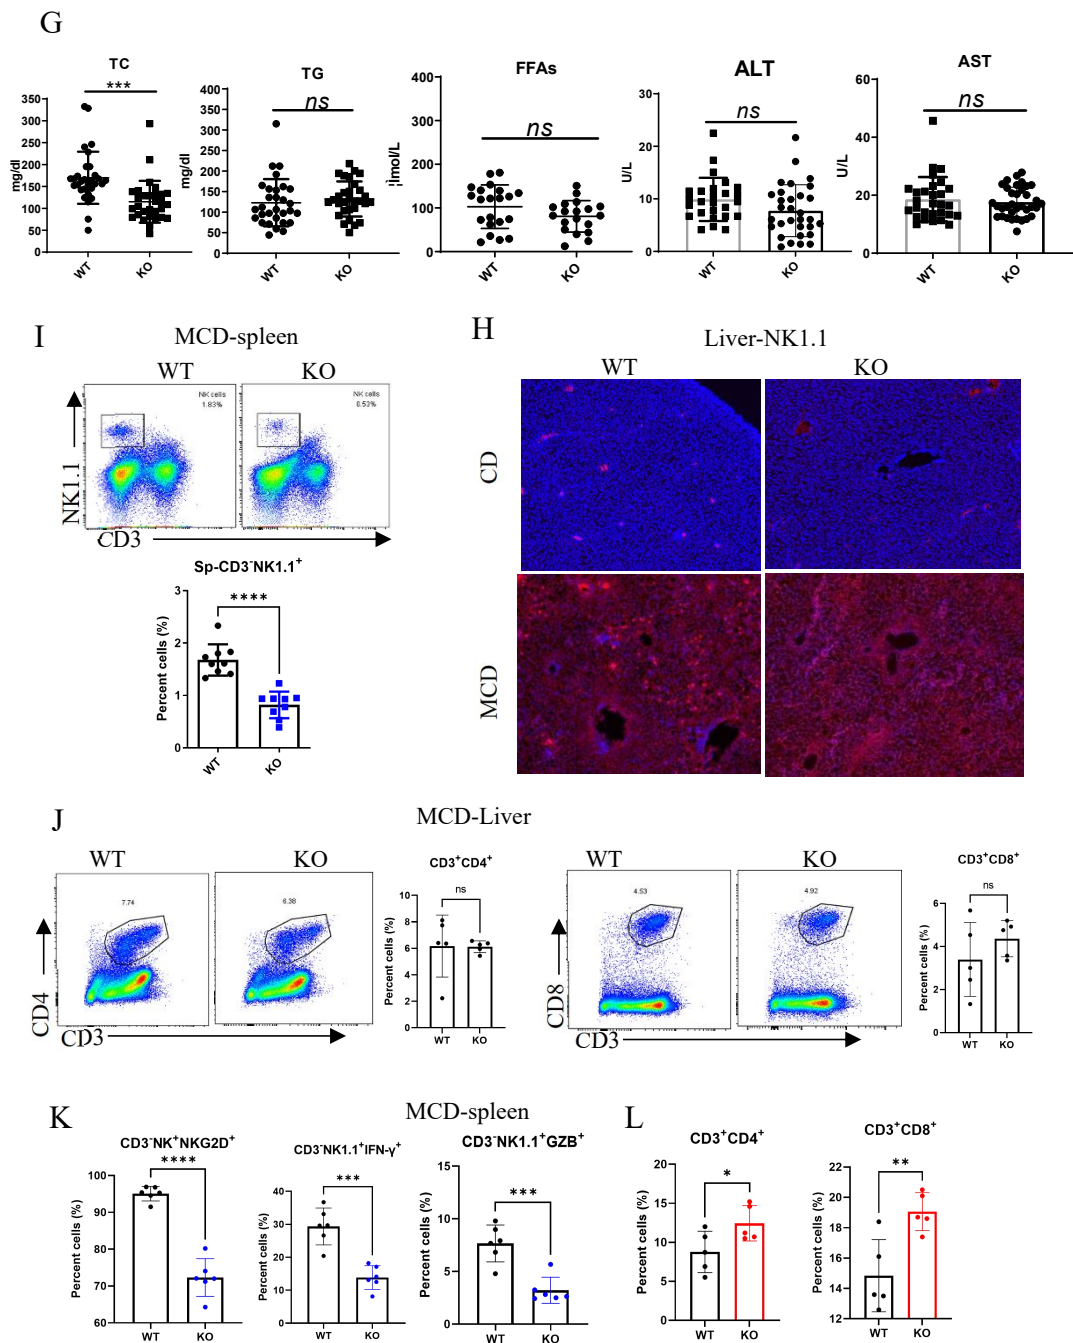

**Supplementary Figure 1.** Downregulation of NK cells in MCD-fed  $UCP1^{-/-}$  mice. (A) Confirmation of  $UCP1$ -deficiency in NK cells and decreased  $UCP1$  of NK cells in WT mice fed with MCD. (B-F) Phenotype, differentiation, and activity of  $UCP1^{-/-}$  NK cells. (G) Serum cholesterol, TG, FFAs, ALT and AST in physiologic WT and KO mice. NK cells in spleens of MCD-fed mice checked by histological immune fluorescence (H) or flow cytometry (I). (J) Liver  $CD4^{+}$  T and  $CD8^{+}$  T cells in mice fed with MCD. Variations of NK cell (K) and  $CD4^{+}$  T and  $CD8^{+}$  T cells in spleens of mice fed with MCD. The experiments were repeated at least twice. Ns, no significance; \*  $P < 0.05$ ; \*\*  $P < 0.01$ ; \*\*\*  $P < 0.001$ .

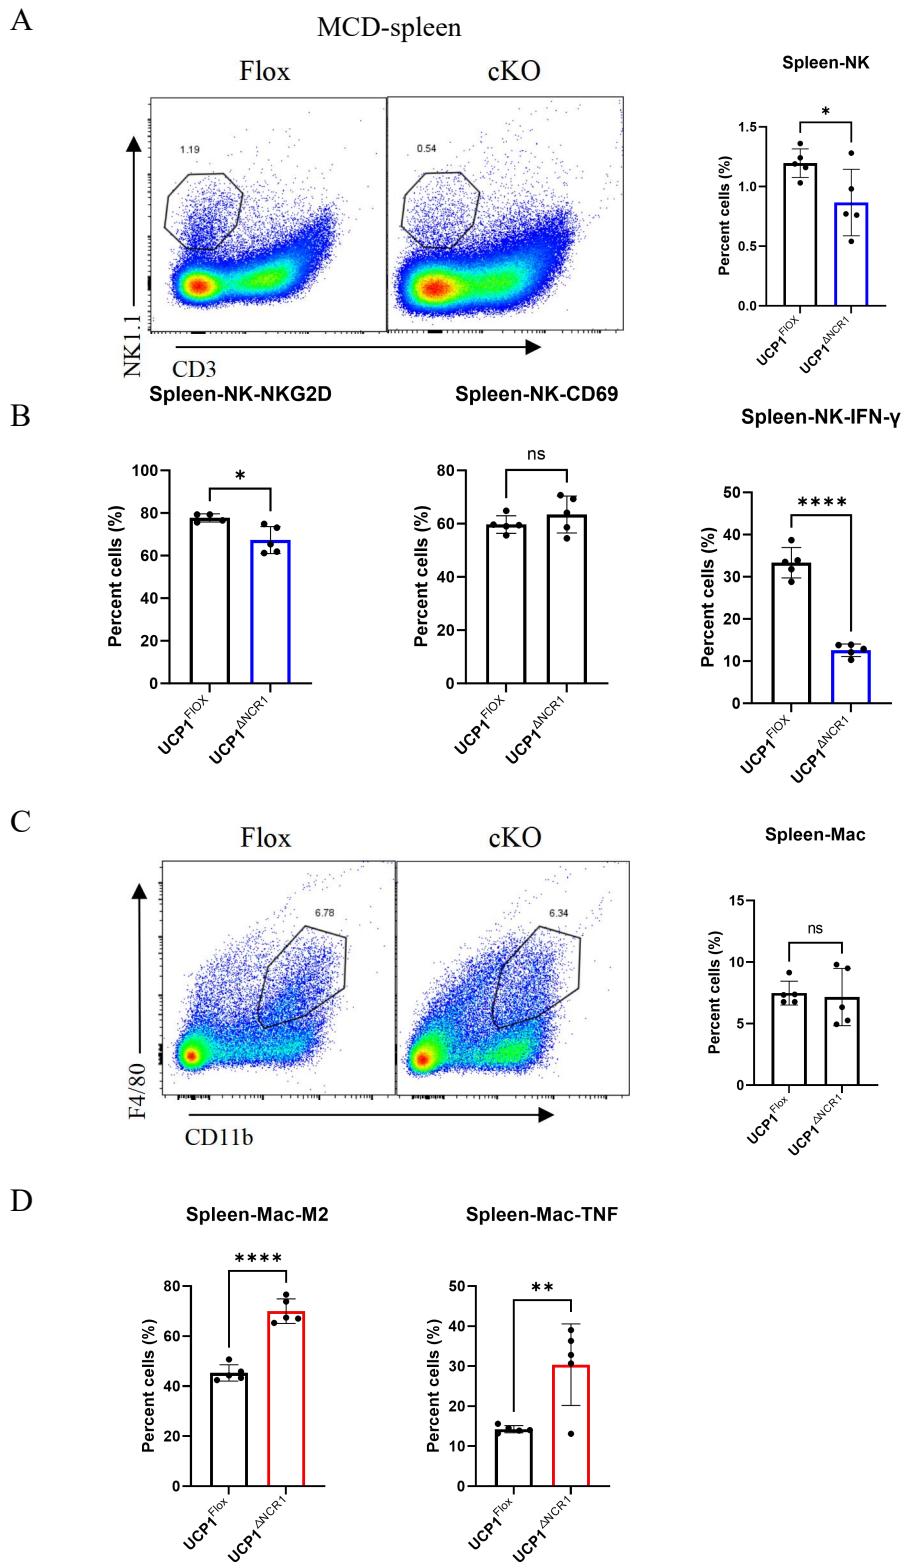

**Supplementary Figure 2.** NK cells in spleens of MCD-fed mice checked by flow cytometry (A). Alteration in NK cell activity (B). frequency of macrophages in spleens of MCD-fed mice (C) and activity (D).

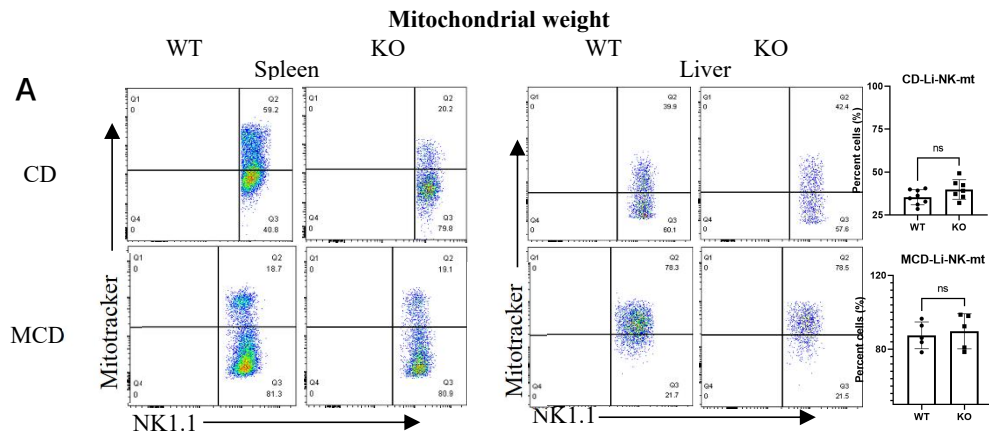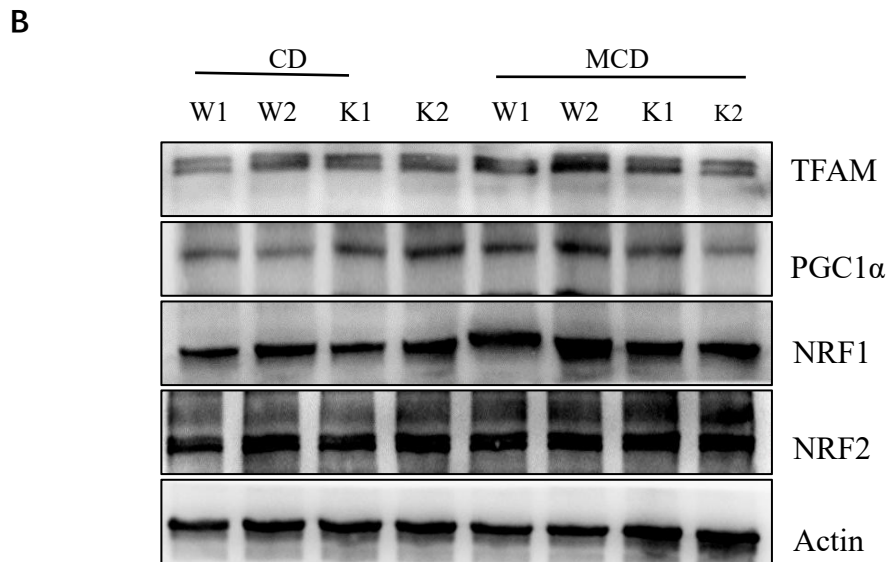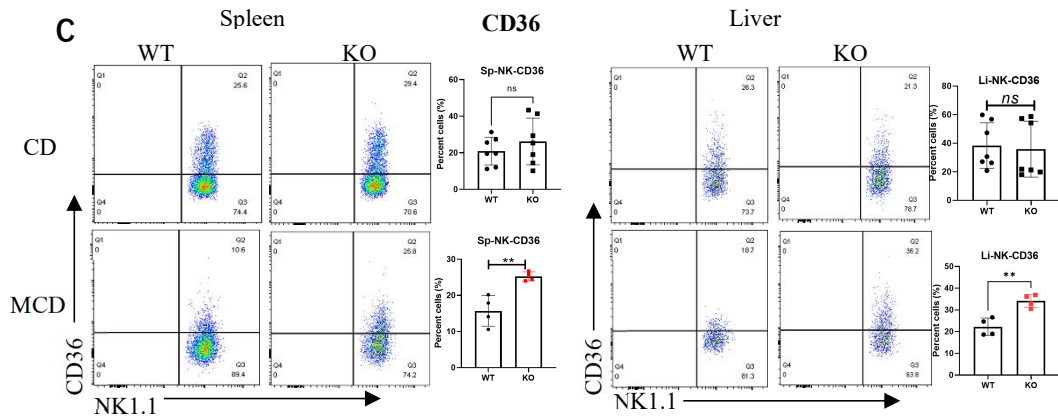

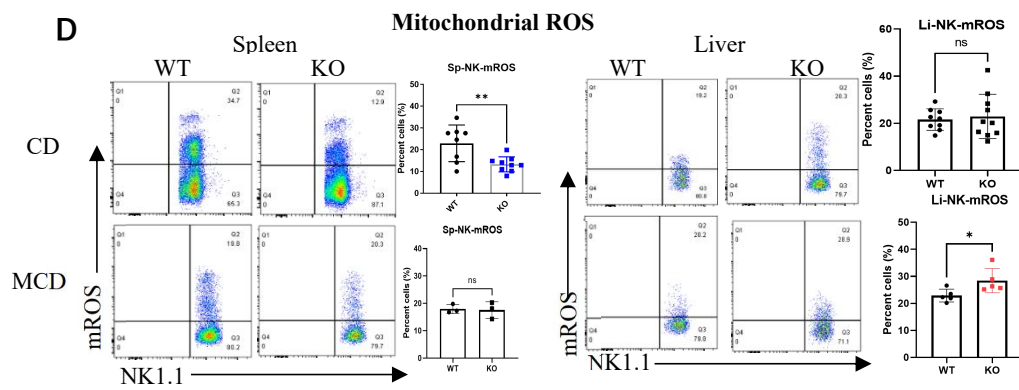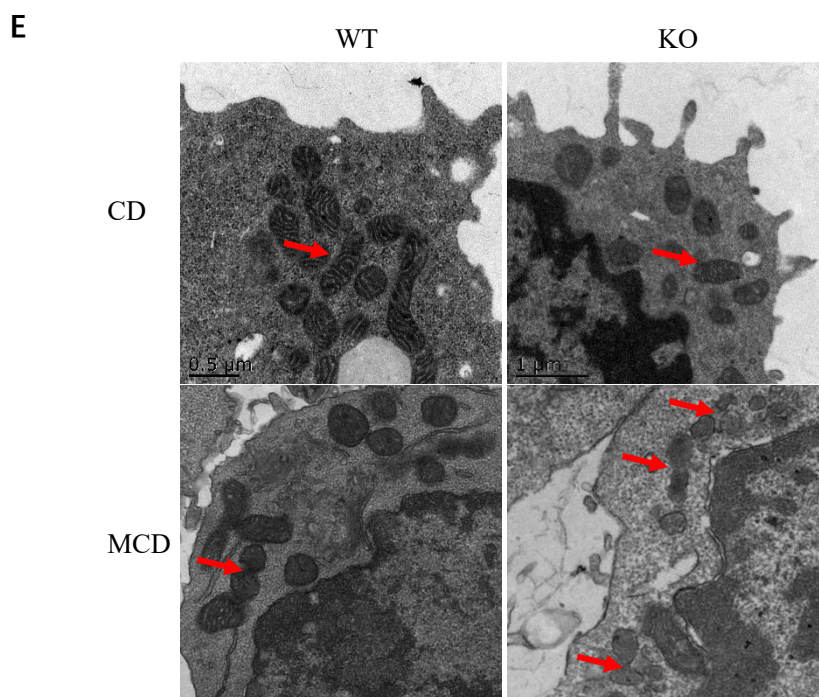

**Supplementary Figure 3.** Variations of mitochondrial weight (A), Mitochondrial biogenesis (B), CD36 (C), mROS (D) and Mitochondrial fission (E) of NK cells in mice upon CD or MCD feeding.

**A**

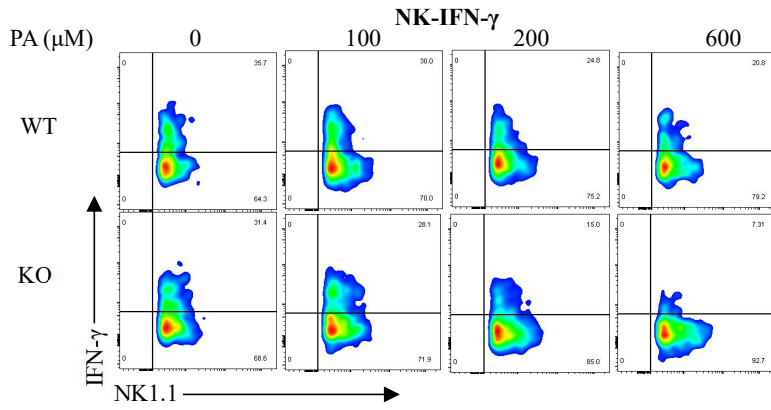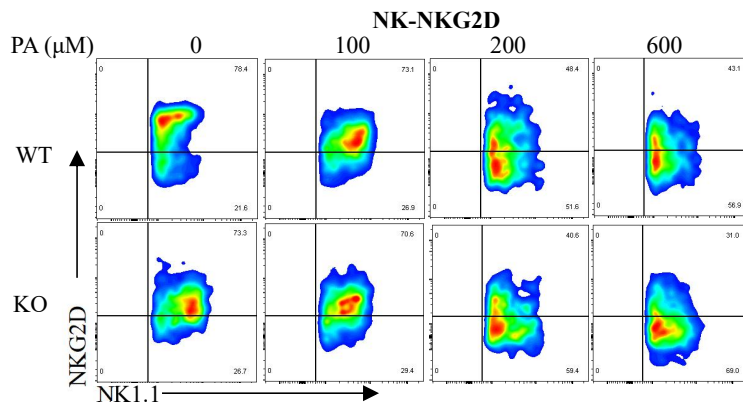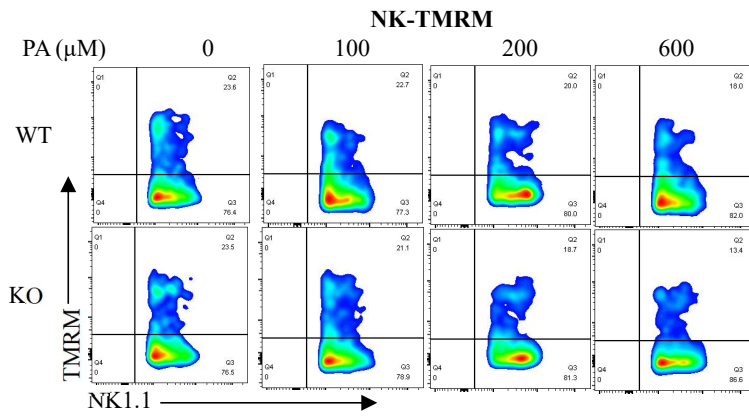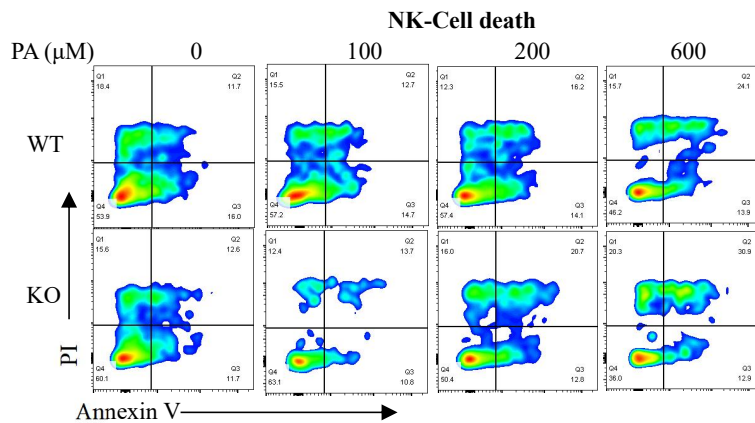



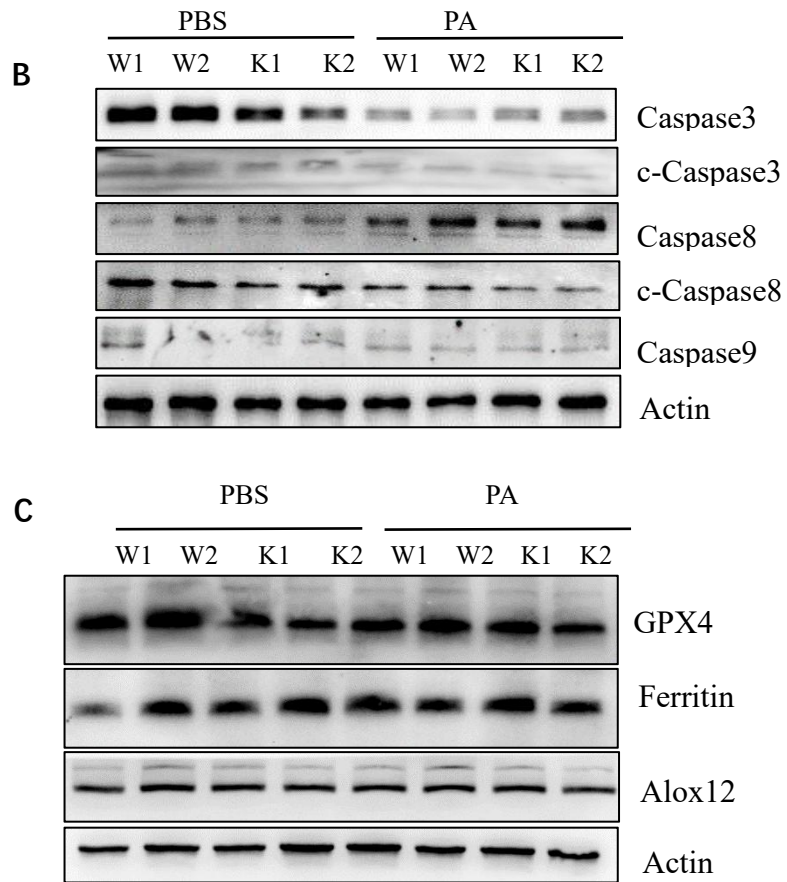

**Supplementary Figure 4.** Variations of NK cell activities by the PA treatment. (A) IFN- $\gamma$ , NKG2D, TMRM, apoptosis of NK cells detected by flow cytometry. (B) Caspase 3, 8, 9 of NK cells treated with PA analyzed by western blot. (C) GPX4, Ferritin, Alox12 of NK cells treated with PA analyzed by western blot.

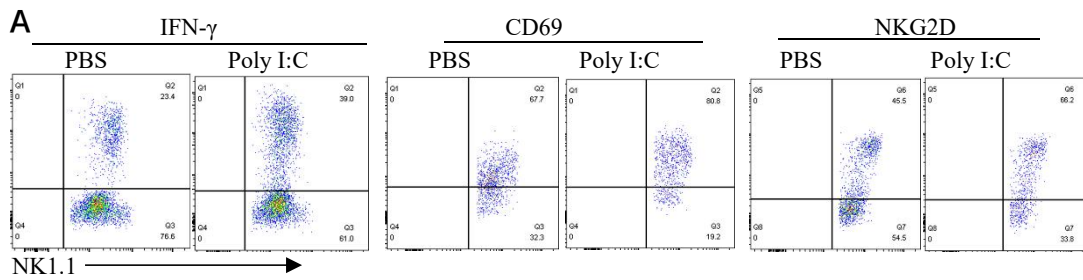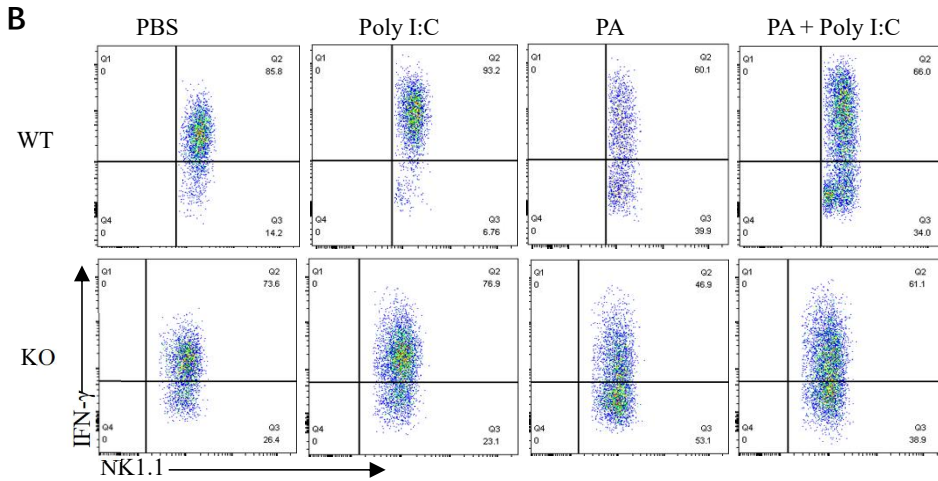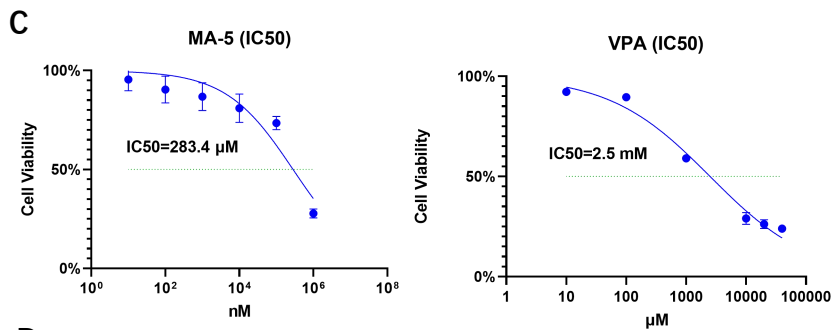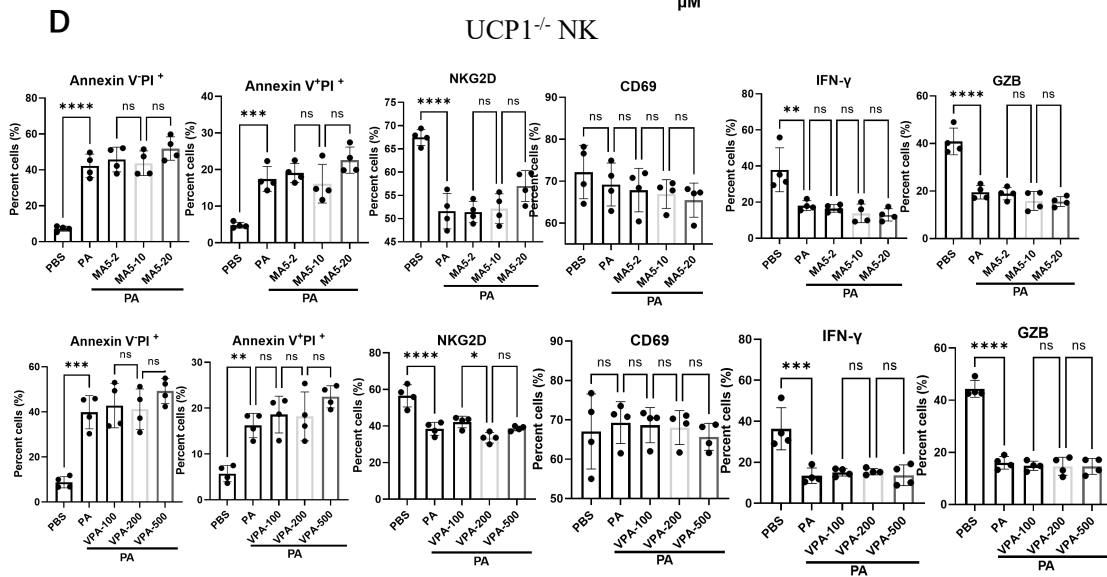



**Supplementary Figure 5.** Representative results of poly I:C on NK cell activation. (A) Representative stimulation of UCP1<sup>-/-</sup> NK cells by poly I:C. (B) Effects of poly I: C on PA-treated NK cells. (C) IC50 of MA-5 or VPA on NK cells. (D) Effects of MA5 or VPA on NK cell activities.

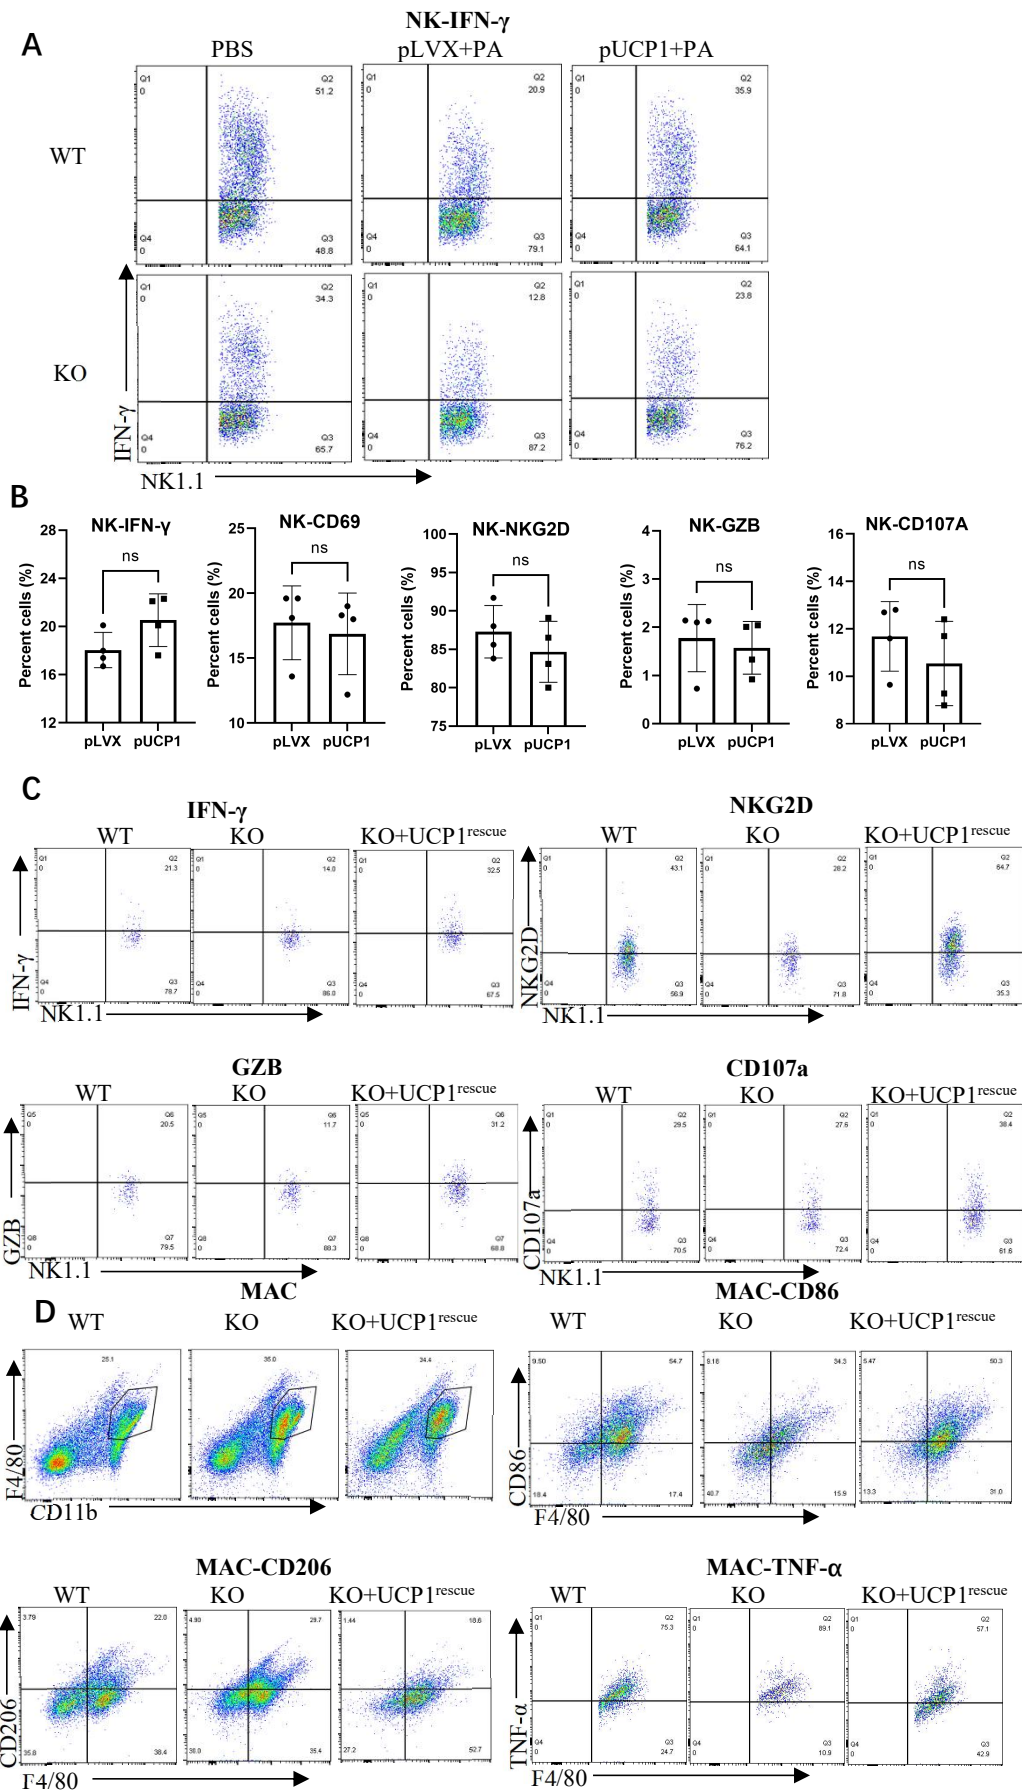

**Supplementary Figure 6.** Rescue expression of UCP1 on NK cell activation. (A) IFN- $\gamma$  production of PA-treated UCP1<sup>-/-</sup>NK cells after the UCP1 transfection. (B) Variations of NK<sup>WT</sup> cell activities by the UCP1 overexpression. Representative results of liver NK cell (C) and macrophage (D) activities in MCD-fed mice infused with UCP1-rescued NK cells.
